# Supplementary material for: Au nanocrystal superlattices: nanocrystallinity, vicinal surfaces, and growth processes
Source: Royal Society of Chemistry journal article supplement (doi:10.1039/c8nr04606a), 2018-01-01
Supplement: c8nr04606a1.pdf [file c8nr04606a1.pdf]

## Supplementary information

# Au nanocrystal superlattices: nanocrystallinity, vicinal surfaces, and growth processes

Detlef Smilgies<sup>a</sup>, Ruipeng Li, and Marie-Paule Pileni<sup>b\*</sup>

a) Cornell High Energy Synchrotron Source (CHESS), Cornell University, Ithaca, New York 14853, United States.

b) CEA/IRAMIS, CEA Saclay, 91191, Gif-sur-Yvette, France

**Corresponding Author** \*mppileni@orange.fr

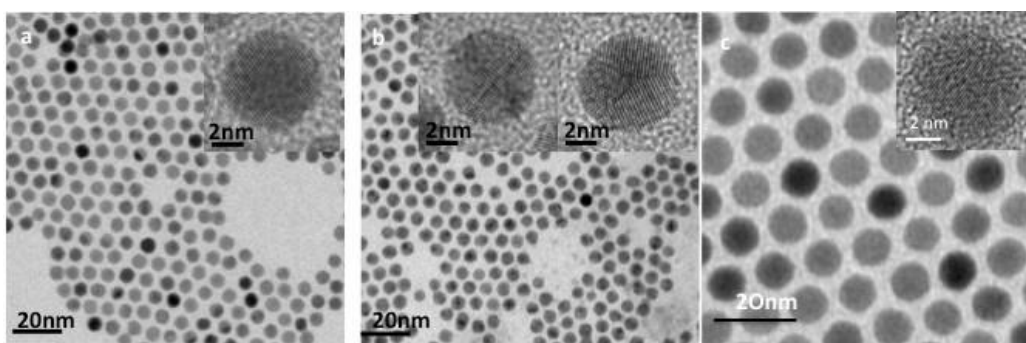

**Figure S1:** TEM images of Au<sub>single</sub> (a) Au<sub>poly</sub> (b) and Co(ε) (c) NCS. Insets corresponding HRTEM images

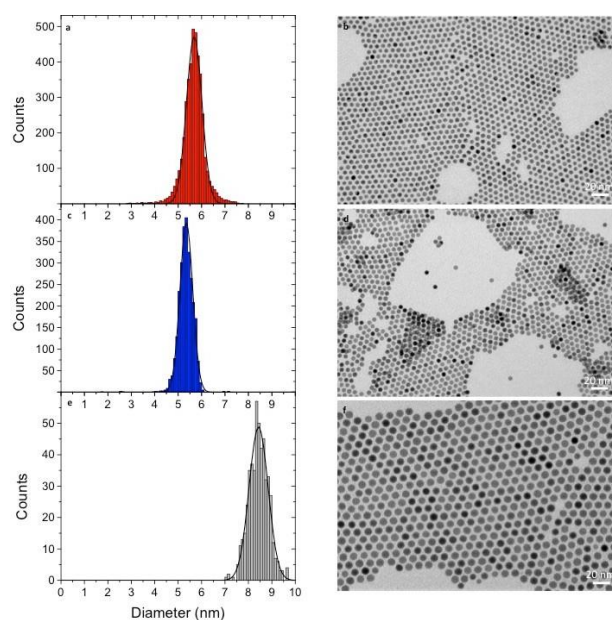

**Figure S2.** Au<sub>poly</sub> (red), Au<sub>single</sub> (blue) and Co(ε) (grey) nanoparticle size distributions (a) and their corresponding TEM pictures (b).

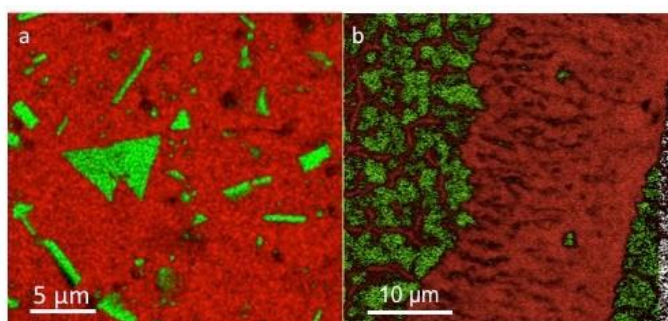

**Figure S3.** Elemental maps corresponding to L<sub>α1</sub> of Au (green) and K<sub>α1</sub> of Co (ε) NCS (red). (a) Self-assembly of Au<sub>single</sub> and Co(ε) NCS. Note the phase separation of Au<sub>single</sub> and Co supracrystals with well defined Au shape supracrystals. (b) Self-assembly of Au<sub>poly</sub> and Co(ε) NCS. Note that Au<sub>poly</sub> and Co(ε) NCS form smaller grains superlattices.

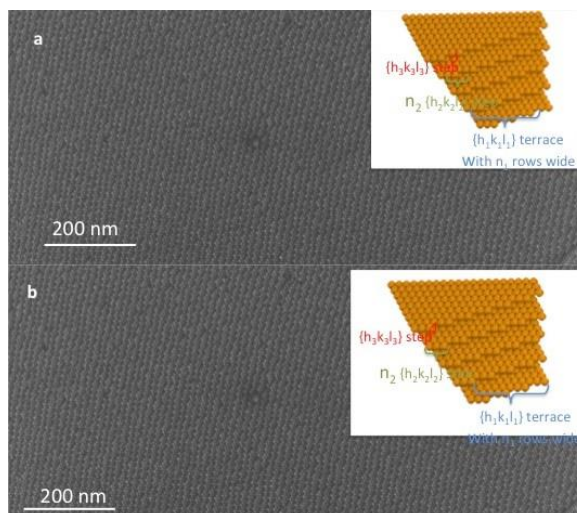

**Figure S4.** Various vicinal surfaces of Au<sub>single</sub> supracrystals in presence of Co( $\epsilon$ ).

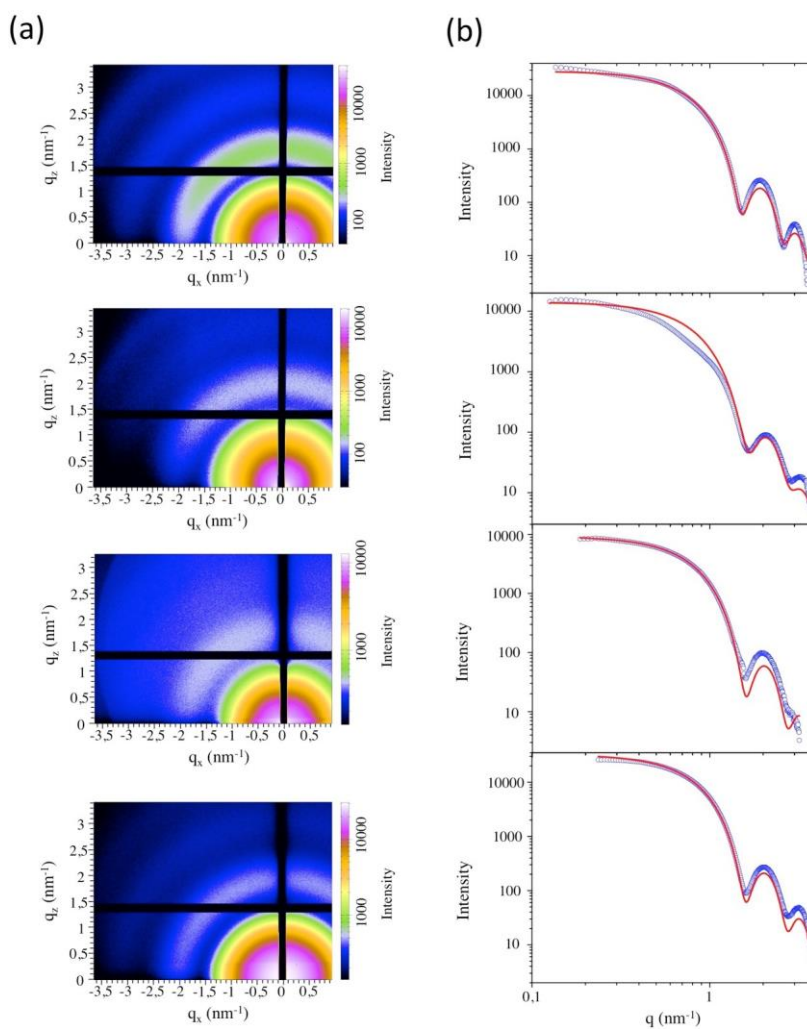

**Figure S6.** GISAXS patterns (a) and their corresponding radially integrated intensity profiles (b) of the initial colloidal solution drop for Au<sub>single</sub>/Co( $\epsilon$ ), Au<sub>poly</sub>/Co( $\epsilon$ ), Au<sub>single</sub> and Au<sub>poly</sub>, from the top to bottom.

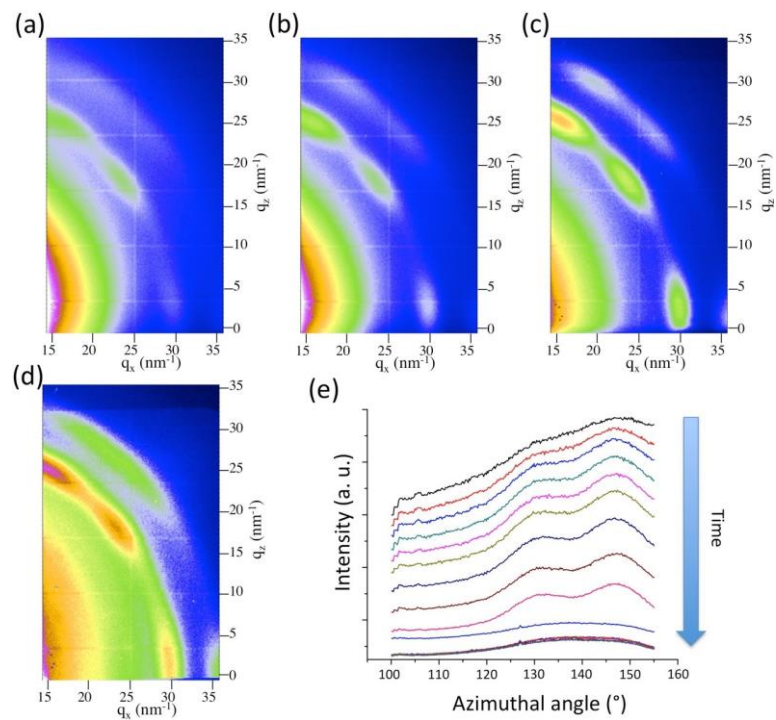

**Figure S7.** Evolution of GIWAXS patterns of  $\text{Au}_{\text{single}}$  NCs at 20s (a), 50s (b), 100s (c) and 140s (d). Evolution of corresponding WAXS profiles (e).

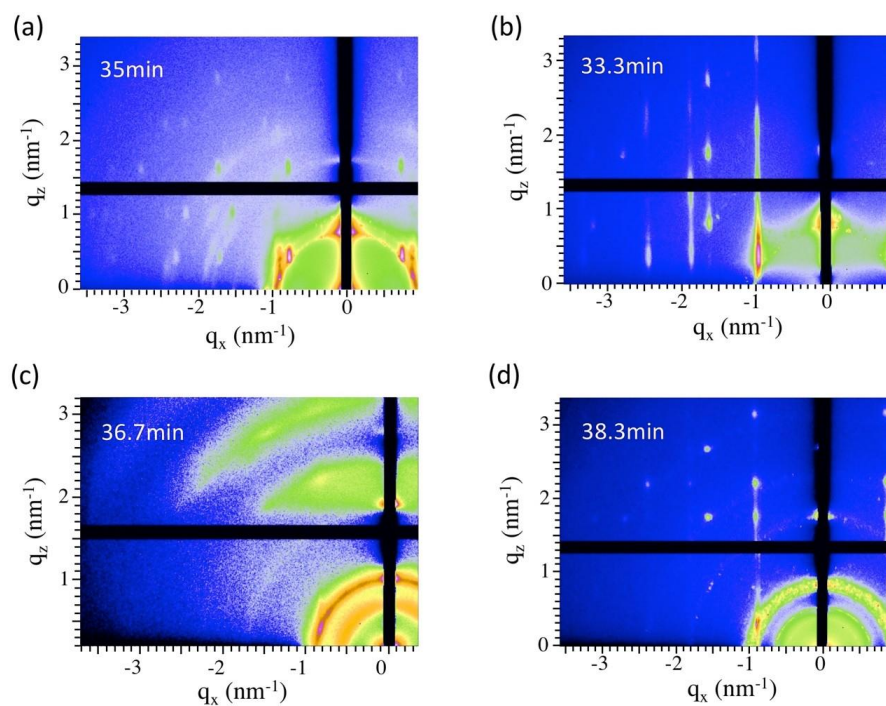

**Figure S8** GISAXS patterns after final evaporation of  $\text{Au}_{\text{single}}$  (a),  $\text{Au}_{\text{poly}}$  (b),  $\text{Au}_{\text{single}}/\text{Co}(\epsilon)$  (c) and  $\text{Au}_{\text{poly}}/\text{Co}(\epsilon)$  (d).

|                      |                                                                                                                                | Toluene atmosphere                                                  | Hexane atmosphere                                                   |
|----------------------|--------------------------------------------------------------------------------------------------------------------------------|---------------------------------------------------------------------|---------------------------------------------------------------------|
|                      |                                                                                                                                | Without Co                                                          | With Co                                                             |
| $Au_{\text{single}}$ | $a_{\text{compressed\_fcc}} = 12.3\text{nm}$<br>$c_{\text{compressed\_fcc}} = 11.2\text{nm}$<br>$d_{\text{pp}} = 3.3\text{nm}$ | $a_{\text{fcc}} = 12.3\text{nm}$                                    | $a_{\text{fcc}} = 12.4\text{nm}$                                    |
|                      |                                                                                                                                | $d_{\text{pp}} = 3.3\text{nm}$                                      | $d_{\text{pp}} = 3.4\text{nm}$                                      |
| $Au_{\text{poly}}$   | $a_{\text{hcp}} = 8.2\text{nm}$<br>$c_{\text{hcp}} = 13.5\text{nm}$<br>$d_{\text{pp}} = 2.6\text{nm}$                          | $a_{\text{hcp}} = 8.2\text{nm}$<br>$c_{\text{hcp}} = 13.4\text{nm}$ | $a_{\text{hcp}} = 8.2\text{nm}$<br>$c_{\text{hcp}} = 13.2\text{nm}$ |
|                      |                                                                                                                                | $d_{\text{pp}} = 2.6\text{nm}$                                      | $d_{\text{pp}} = 2.5\text{nm}$                                      |

**Table S1.** Au SC parameters differing by their nanocrystallinity, single domain ( $Au_{\text{single}}$ ) and polycrystals ( $Au_{\text{poly}}$ ), deduced from GISAXS patterns in the various experimental conditions. Let admit an error of 0.1nm no influence of Co( $\epsilon$ ) NCs.

| Sample                           | $D_{\text{SAXS}}$ | $\sigma_{\text{SAXS}}$ | $D_{\text{TEM}}$ | $\sigma_{\text{TEM}}$ |
|----------------------------------|-------------------|------------------------|------------------|-----------------------|
| $Au_{\text{single}}$             | 5.54              | 0.40                   | 5.4              | 0.4                   |
| $Au_{\text{poly}}$               | 5.56              | 0.40                   | 5.6              | 0.4                   |
| $Au_{\text{single}} + \text{Co}$ | 5.84              | 0.44                   |                  |                       |
| $Au_{\text{poly}} + \text{Co}$   | 5.30              | 0.54                   |                  |                       |

**Table S2.** NC diameter determined by SAXS ( $D_{\text{SAXS}}$ ) and TEM ( $D_{\text{TEM}}$ ) with their corresponding standard deviation ( $\sigma$ ).
